# Supplementary material for: Uncovering the hidden diversity of Mississippian crinoids (Crinoidea, Echinodermata) from Poland
Source: PeerJ. 2020 Dec 21;8:e10641. doi: 10.7717/peerj.10641 (PMC7759130; doi:10.7717/peerj.10641)
Supplement: Supplemental Information 1 — The Carboniferous crinoid collection from Poland is housed at the University of Silesia in Katowice, Faculty of Natural Sciences, Institute of Earth Sciences, Poland, under catalogue number: GIUS 5–3695, 5–543. [file peerj-08-10641-s001.xlsx]

## Sheet: Sheet1
The Carboniferous crinoid collection from Poland is housed at the University of Silesia in Katowice, Faculty of Natural Sciences, Institute of Earth Sciences, Poland, under catalogue number: GIUS 5–3695, 5–543.
Indentification
Lanecrinus? sp.	GIUS 5-543
crinoid pluricolumnal	GIUS 5-3695/Czatkowice 2
Cyathocrinites mammallaris	GIUS 5-3695/Ostrówka 1
Cladida Indeterminate A	GIUS 5-3695/Ostrówka 2
Cladida Indeterminate B	GIUS 5-3695/Ostrówka 3
Gilbertsocrinus sp.	GIUS 5-3695/Ostrówka 4
Gilbertsocrinus sp.	GIUS 5-3695/Ostrówka 5
Gilbertsocrinus sp.	GIUS 5-3695/Ostrówka 6
Platycrinitidae Indeterminate	GIUS 5-3695/Ostrówka 7
Platycrinitidae Indeterminate	GIUS 5-3695/Ostrówka 8
Crinoidea Indeterminate A	GIUS 5-3695/Ostrówka 9
Cyathoform radial plate	GIUS 5-3695/Ostrówka 10
Cyathoform radial plate	GIUS 5-3695/Ostrówka 11
Flexibilia brachial plate	GIUS 5-3695/Ostrówka 12
Flexibilia brachial plate	GIUS 5-3695/Ostrówka 13
Flexibilia brachial plate	GIUS 5-3695/Ostrówka 14
Flexibilia brachial plate	GIUS 5-3695/Ostrówka 15
Flexibilia brachial plate	GIUS 5-3695/Ostrówka 16
Flexibilia brachial plate	GIUS 5-3695/Ostrówka 17
Flexibilia brachial plate	GIUS 5-3695/Ostrówka 18
Flexibilia brachial plate	GIUS 5-3695/Ostrówka 19
Articuliformes radial plate	GIUS 5-3695/Ostrówka 20
Articuliformes radial plate	GIUS 5-3695/Ostrówka 21
Articuliformes radial plate	GIUS 5-3695/Ostrówka 22
Articuliformes radial plate	GIUS 5-3695/Ostrówka 23
Articuliformes radial plate	GIUS 5-3695/Ostrówka 24
Articuliformes radial plate	GIUS 5-3695/Ostrówka 25
Articuliformes radial plate	GIUS 5-3695/Ostrówka 26
Articuliformes radial plate	GIUS 5-3695/Ostrówka 27
Articuliformes radial plate	GIUS 5-3695/Ostrówka 28
Articuliformes radial plate	GIUS 5-3695/Ostrówka 29
Articuliformes radial plate	GIUS 5-3695/Ostrówka 30
Articuliformes radial plate	GIUS 5-3695/Ostrówka 31
Articuliformes radial plate	GIUS 5-3695/Ostrówka 32
Articuliformes radial plate	GIUS 5-3695/Ostrówka 33
Articuliformes radial plate	GIUS 5-3695/Ostrówka 34
Articuliformes radial plate	GIUS 5-3695/Ostrówka 35
Articuliformes radial plate	GIUS 5-3695/Ostrówka 36
Articuliformes brachial plate	GIUS 5-3695/Ostrówka 37
Articuliformes brachial plate	GIUS 5-3695/Ostrówka 38
Articuliformes brachial plate	GIUS 5-3695/Ostrówka 39
Articuliformes brachial plate	GIUS 5-3695/Ostrówka 40
Articuliformes brachial plate	GIUS 5-3695/Ostrówka 41
Articuliformes brachial plate	GIUS 5-3695/Ostrówka 42
Articuliformes brachial plate	GIUS 5-3695/Ostrówka 43
Articuliformes brachial plate	GIUS 5-3695/Ostrówka 44
Articuliformes brachial plate	GIUS 5-3695/Ostrówka 45
Articuliformes brachial plate	GIUS 5-3695/Ostrówka 46
Articuliformes brachial plate	GIUS 5-3695/Ostrówka 47
Articuliformes brachial plate	GIUS 5-3695/Ostrówka 48
Articuliformes brachial plate	GIUS 5-3695/Ostrówka 49
Crinoid columnal	GIUS 5-3695/Ostrówka 50
Crinoid columnal	GIUS 5-3695/Ostrówka 51
Crinoid columnal	GIUS 5-3695/Ostrówka 52
Crinoid columnal	GIUS 5-3695/Ostrówka 53
Crinoid columnal	GIUS 5-3695/Ostrówka 54
Crinoid columnal	GIUS 5-3695/Ostrówka 55
lepidocentrid echinoid plate	GIUS 5-3695/Ostrówka 56
Crinoidea Indeterminate B	GIUS 5-3695/Golonog1
